# Supplementary material for: Genome-Wide Analysis of C/S1-bZIP Subfamilies in Populus tomentosa and Unraveling the Role of PtobZIP55/21 in Response to Low Energy
Source: MDPI journal article supplement (doi:10.3390/ijms25105163), 2024-05-09
Supplement: s1 [file s1]

**Table S1.** *C/SI-bZIP* genes identified in *P. tomentosa*.

| Gene names       | Gene ID             | Chr | Number of<br>Amino Acid (aa) | Molecular<br>Weight (kDa) | Theoretical<br>pI | Instability Index |
|------------------|---------------------|-----|------------------------------|---------------------------|-------------------|-------------------|
| <i>PtobZIP42</i> | <i>POTOM_026607</i> | 6   | 301                          | 32.48                     | 5.72              | 53.91             |
| <i>PtobZIP25</i> | <i>POTOM_020647</i> | 5   | 457                          | 49.37                     | 6.36              | 61.39             |
| <i>PtobZIP32</i> | <i>POTOM_021892</i> | 5   | 443                          | 47.74                     | 6.69              | 54.87             |
| <i>PtobZIP7</i>  | <i>POTOM_009536</i> | 2   | 497                          | 53.85                     | 5.78              | 57.58             |
| <i>PtobZIP49</i> | <i>POTOM_031535</i> | 8   | 143                          | 16.46                     | 9.36              | 68.21             |
| <i>PtobZIP63</i> | <i>POTOM_038208</i> | 10  | 143                          | 16.51                     | 9.66              | 56.33             |
| <i>PtobZIP75</i> | <i>POTOM_048317</i> | 14  | 139                          | 15.88                     | 7.84              | 58.38             |
| <i>PtobZIP15</i> | <i>POTOM_010759</i> | 2   | 144                          | 16.50                     | 8.88              | 55.79             |
| <i>PtobZIP44</i> | <i>POTOM_027938</i> | 7   | 164                          | 18.71                     | 6.2               | 62.87             |
| <i>PtobZIP27</i> | <i>POTOM_021242</i> | 5   | 162                          | 18.25                     | 6.59              | 70.33             |
| <i>PtobZIP21</i> | <i>POTOM_017716</i> | 4   | 155                          | 17.44                     | 8.1               | 61.51             |
| <i>PtobZIP55</i> | <i>POTOM_034782</i> | 9   | 155                          | 17.30                     | 8.09              | 47.95             |
| <i>PtobZIP33</i> | <i>POTOM_022015</i> | 5   | 158                          | 18.32                     | 6.05              | 47.9              |
| <i>PtobZIP6</i>  | <i>POTOM_009428</i> | 2   | 156                          | 17.90                     | 6.18              | 43.91             |

**Table S2.** Accession numbers of *C/SI*-genes presented in Fig. 1.

| Gene Name       | Locus names or Accession nos. or AGI codes | Species                     |
|-----------------|--------------------------------------------|-----------------------------|
| <i>AtbZIP9</i>  | <i>AT5G24800</i>                           | <i>Arabidopsis thaliana</i> |
| <i>AtbZIP10</i> | <i>AT4G02640</i>                           | <i>A. thaliana</i>          |
| <i>AtbZIP25</i> | <i>AT3G54620</i>                           | <i>A. thaliana</i>          |
| <i>AtbZIP63</i> | <i>AT5G28770</i>                           | <i>A. thaliana</i>          |
| <i>AtbZIP1</i>  | <i>AT5G49450</i>                           | <i>A. thaliana</i>          |
| <i>AtbZIP2</i>  | <i>AT2G18160</i>                           | <i>A. thaliana</i>          |
| <i>AtbZIP11</i> | <i>AT4G34590</i>                           | <i>A. thaliana</i>          |
| <i>AtbZIP44</i> | <i>AT1G75390</i>                           | <i>A. thaliana</i>          |
| <i>AtbZIP53</i> | <i>AT3G62420</i>                           | <i>A. thaliana</i>          |
| <i>MdbZIP81</i> | <i>MDP0000431572</i>                       | <i>Malus domestica</i>      |
| <i>MdbZIP82</i> | <i>MDP0000441891</i>                       | <i>M. domestica</i>         |
| <i>MdbZIP92</i> | <i>MDP0000680042</i>                       | <i>M. domestica</i>         |
| <i>MdbZIP75</i> | <i>MDP0000270365</i>                       | <i>M. domestica</i>         |
| <i>MdbZIP24</i> | <i>MDP0000275309</i>                       | <i>M. domestica</i>         |
| <i>MdbZIP56</i> | <i>MDP0000176747</i>                       | <i>M. domestica</i>         |
| <i>MdbZIP2</i>  | <i>MDP0000249561</i>                       | <i>M. domestica</i>         |
| <i>MdbZIP3</i>  | <i>MDP0000265875</i>                       | <i>M. domestica</i>         |
| <i>MdbZIP41</i> | <i>MDP0000205823</i>                       | <i>M. domestica</i>         |
| <i>MdbZIP61</i> | <i>MDP0000239026</i>                       | <i>M. domestica</i>         |
| <i>MdbZIP40</i> | <i>MDP0000521934</i>                       | <i>M. domestica</i>         |
| <i>MdbZIP73</i> | <i>MDP0000448715</i>                       | <i>M. domestica</i>         |
| <i>MdbZIP20</i> | <i>MDP0000437680</i>                       | <i>M. domestica</i>         |
| <i>MdbZIP63</i> | <i>MDP0000234798</i>                       | <i>M. domestica</i>         |
| <i>MdbZIP64</i> | <i>MDP0000949327</i>                       | <i>M. domestica</i>         |
| <i>SlbZIP06</i> | <i>Solyc01g097330</i>                      | <i>Solanum lycopersicum</i> |
| <i>SlbZIP48</i> | <i>Solyc08g006110</i>                      | <i>S. lycopersicum</i>      |
| <i>SlbZIP49</i> | <i>Solyc08g022080</i>                      | <i>S. lycopersicum</i>      |
| <i>SlbZIP04</i> | <i>Solyc01g079480</i>                      | <i>S. lycopersicum</i>      |
| <i>SlbZIP07</i> | <i>Solyc01g100460</i>                      | <i>S. lycopersicum</i>      |
| <i>SlbZIP10</i> | <i>Solyc01g109880</i>                      | <i>S. lycopersicum</i>      |
| <i>SlbZIP15</i> | <i>Solyc02g084860</i>                      | <i>S. lycopersicum</i>      |
| <i>SlbZIP19</i> | <i>Solyc03g033730</i>                      | <i>S. lycopersicum</i>      |
| <i>SlbZIP34</i> | <i>Solyc04g080740</i>                      | <i>S. lycopersicum</i>      |
| <i>SlbZIP39</i> | <i>Solyc06g009640</i>                      | <i>S. lycopersicum</i>      |
| <i>StbZIP38</i> | <i>PGSC0003DMT400038493</i>                | <i>Solanum tuberosum</i>    |
| <i>StbZIP02</i> | <i>PGSC0003DMT400088166</i>                | <i>S. tuberosum</i>         |
| <i>StbZIP04</i> | <i>PGSC0003DMT400007165</i>                | <i>S. tuberosum</i>         |
| <i>StbZIP05</i> | <i>PGSC0003DMT400085559</i>                | <i>S. tuberosum</i>         |
| <i>StbZIP08</i> | <i>PGSC0003DMT400079474</i>                | <i>S. tuberosum</i>         |
| <i>StbZIP12</i> | <i>PGSC0003DMT400040054</i>                | <i>S. tuberosum</i>         |
| <i>StbZIP13</i> | <i>PGSC0003DMT400009068</i>                | <i>S. tuberosum</i>         |

**Table S2.** continued

| Gene Name        | Locus names or Accession nos. or AGI codes | Species                  |
|------------------|--------------------------------------------|--------------------------|
| <i>StbZIP17</i>  | <i>PGSC0003DMT400058187</i>                | <i>S. tuberosum</i>      |
| <i>StbZIP26</i>  | <i>PGSC0003DMT400009493</i>                | <i>S. tuberosum</i>      |
| <i>StbZIP31</i>  | <i>PGSC0003DMT400018832</i>                | <i>S. tuberosum</i>      |
| <i>StbZIP43</i>  | <i>PGSC0003DMT400043542</i>                | <i>S. tuberosum</i>      |
| <i>ZmbZIP9</i>   | <i>GRMZM2G073427</i>                       | <i>Zea mays</i>          |
| <i>ZmbZIP16</i>  | <i>GRMZM2G019446</i>                       | <i>Z. mays</i>           |
| <i>ZmbZIP17</i>  | <i>GRMZM2G016150</i>                       | <i>Z. mays</i>           |
| <i>ZmbZIP60</i>  | <i>GRMZM2G007063</i>                       | <i>Z. mays</i>           |
| <i>ZmbZIP65</i>  | <i>GRMZM2G098904</i>                       | <i>Z. mays</i>           |
| <i>ZmbZIP85</i>  | <i>GRMZM2G015534</i>                       | <i>Z. mays</i>           |
| <i>ZmbZIP112</i> | <i>GRMZM2G103647</i>                       | <i>Z. mays</i>           |
| <i>ZmbZIP7</i>   | <i>GRMZM2G093020</i>                       | <i>Z. mays</i>           |
| <i>ZmbZIP22</i>  | <i>AC203957.3_FG004</i>                    | <i>Z. mays</i>           |
| <i>ZmbZIP59</i>  | <i>GRMZM2G361611</i>                       | <i>Z. mays</i>           |
| <i>ZmbZIP64</i>  | <i>GRMZM2G444748</i>                       | <i>Z. mays</i>           |
| <i>ZmbZIP87</i>  | <i>GRMZM2G092137</i>                       | <i>Z. mays</i>           |
| <i>PtobZIP42</i> | <i>POTOM_026607</i>                        | <i>Populus tomentosa</i> |
| <i>PtobZIP25</i> | <i>POTOM_020647</i>                        | <i>P. tomentosa</i>      |
| <i>PtobZIP32</i> | <i>POTOM_021892</i>                        | <i>P. tomentosa</i>      |
| <i>PtobZIP7</i>  | <i>POTOM_009536</i>                        | <i>P. tomentosa</i>      |
| <i>PtobZIP49</i> | <i>POTOM_031535</i>                        | <i>P. tomentosa</i>      |
| <i>PtobZIP63</i> | <i>POTOM_038208</i>                        | <i>P. tomentosa</i>      |
| <i>PtobZIP75</i> | <i>POTOM_048317</i>                        | <i>P. tomentosa</i>      |
| <i>PtobZIP15</i> | <i>POTOM_010759</i>                        | <i>P. tomentosa</i>      |
| <i>PtobZIP44</i> | <i>POTOM_027938</i>                        | <i>P. tomentosa</i>      |
| <i>PtobZIP27</i> | <i>POTOM_021242</i>                        | <i>P. tomentosa</i>      |
| <i>PtobZIP21</i> | <i>POTOM_017716</i>                        | <i>P. tomentosa</i>      |
| <i>PtobZIP55</i> | <i>POTOM_034782</i>                        | <i>P. tomentosa</i>      |
| <i>PtobZIP33</i> | <i>POTOM_022015</i>                        | <i>P. tomentosa</i>      |
| <i>PtobZIP6</i>  | <i>POTOM_009428</i>                        | <i>P. tomentosa</i>      |

**Table S3.** The conserved motifs of the C/S1-bZIP proteins in Fig. 3.

| Motif    | Motif Consensus                                     | Width |
|----------|-----------------------------------------------------|-------|
| Motif 1  | VDERKRKRKMJSNRESARRSRMRKQKHLDDLVTQVSQLRKENNQJLTRINV | 50    |
| Motif 2  | TTQRYLNVEAENSILRAQIEELSHRLKSLNEILKYVNGSNG           | 41    |
| Motif 3  | ADDSFLNPLNLAYLNQPIMASADLFQY                         | 27    |
| Motif 4  | MASSSGASSGSTKMQRSGSEE                               | 21    |
| Motif 5  | CPNPHPQPLGRNLTAPIDSEEYRAFLKSKLDLACAAVAMSR           | 41    |
| Motif 6  | DGGS LGIPALPTAQKKQEVQARQTTSGSSREDSDDDDLEGDTGTNENMDP | 50    |
| Motif 7  | ADDSFLNPLNLAYLNQPIMASADLFQY                         | 26    |
| Motif 8  | FQNPWQVGAPVGPAGASPMFD                               | 21    |
| Motif 9  | MNSVFSVDDFSGPFW                                     | 15    |
| Motif 10 | PSPGMPFVGGQVDASTDVAVP                               | 21    |

**Table S4.** Identification of uORFs in S1-bZIPs from different species

| Protein Name | uORF sequence                                  | length (aa) | Species                     |
|--------------|------------------------------------------------|-------------|-----------------------------|
| AtbZIP1      | MINLNQFLVYHSISVVILHWFYVIS                      | 25          | <i>Arabidopsis thaliana</i> |
| AtbZIP2      | MTPVLCEILLSGLTVKSALCRRTHLVQSFSVVFLYWFYNVS      | 41          | <i>A. thaliana</i>          |
| AtbZIP11     | MSPIILSEIFLSGFMLNSTIRRRTHLVQSFSVVFLYWLYYVS     | 42          | <i>A. thaliana</i>          |
| AtbZIP44     | MSPVISEILRSGLTIDSSLRRRTHLVQSFSVVFLYWFYVFS      | 41          | <i>A. thaliana</i>          |
| AtbZIP53     | MSYSILFRRIRILHSFSVVYLYTYVFS                    | 28          | <i>A. thaliana</i>          |
| MdbZIP2      | —                                              | —           | <i>Malus domestica</i>      |
| MdbZIP3      | —                                              | —           | <i>M. domestica</i>         |
| MdbZIP41     | —                                              | —           | <i>M. domestica</i>         |
| MdbZIP61     | —                                              | —           | <i>M. domestica</i>         |
| MdbZIP40     | —                                              | —           | <i>M. domestica</i>         |
| MdbZIP73     | —                                              | —           | <i>M. domestica</i>         |
| MdbZIP20     | —                                              | —           | <i>M. domestica</i>         |
| MdbZIP63     | —                                              | —           | <i>M. domestica</i>         |
| MdbZIP64     | —                                              | —           | <i>M. domestica</i>         |
| SlbZIP04     | MIHMRRVRIMHSFSVVFLYWFYVFS                      | 25          | <i>Solanum lycopersicum</i> |
| SlbZIP07     | MISAITITFLGDCFRQSFSVLFLYHFYDFS                 | 30          | <i>S. lycopersicum</i>      |
| SlbZIP10     | MINSTYRRRTHLVQSFSVVFLYWFYFIS                   | 28          | <i>S. lycopersicum</i>      |
| SlbZIP15     | —                                              | —           | <i>S. lycopersicum</i>      |
| SlbZIP19     | —                                              | —           | <i>S. lycopersicum</i>      |
| SlbZIP34     | —                                              | —           | <i>S. lycopersicum</i>      |
| SlbZIP39     | —                                              | —           | <i>S. lycopersicum</i>      |
| StbZIP02     | —                                              | —           | <i>Solanum tuberosum</i>    |
| StbZIP04     | —                                              | —           | <i>S. tuberosum</i>         |
| StbZIP05     | —                                              | —           | <i>S. tuberosum</i>         |
| StbZIP08     | —                                              | —           | <i>S. tuberosum</i>         |
| StbZIP12     | —                                              | —           | <i>S. tuberosum</i>         |
| StbZIP13     | —                                              | —           | <i>S. tuberosum</i>         |
| StbZIP17     | —                                              | —           | <i>S. tuberosum</i>         |
| StbZIP26     | —                                              | —           | <i>S. tuberosum</i>         |
| StbZIP31     | —                                              | —           | <i>S. tuberosum</i>         |
| StbZIP43     | —                                              | —           | <i>S. tuberosum</i>         |
| ZmbZIP7      | MSQILSEVSHRCRFMINSTLRRGTHLVLSFSVVFLYWFYVFSVRS  | 45          | <i>Zea mays</i>             |
| ZmbZIP22     | MLLLLVLSEHLLLSGFMIGSAITRLVQSFSVVFLYWFYVFSVCHCQ | 46          | <i>Z. mays</i>              |
| ZmbZIP59     | —                                              | —           | <i>Z. mays</i>              |
| ZmbZIP64     | —                                              | —           | <i>Z. mays</i>              |
| ZmbZIP87     | —                                              | —           | <i>Z. mays</i>              |
| PtobZIP49    | MKYFRLFCQIKISHSVSVLLYWFYVFS                    | 28          | <i>Populus tomentosa</i>    |
| PtobZIP63    | MNHLRLFCRNKISHSVSVLLYWFYVFS                    | 28          | <i>P. tomentosa</i>         |
| PtobZIP75    | MTYSILMRRIRILHSFSVVFLYWFYVFS                   | 41          | <i>P. tomentosa</i>         |
| PtobZIP15    | —                                              | —           | <i>P. tomentosa</i>         |
| PtobZIP44    | MTPVLSEILLSGFTINSTLRRGTHLVQSFSVVFLYWFYVFS      | 41          | <i>P. tomentosa</i>         |

**Table S4.** continued

| Protein Name | uORF sequence                             | length (aa) | Species             |
|--------------|-------------------------------------------|-------------|---------------------|
| PtobZIP27    | —                                         | —           | <i>P. tomentosa</i> |
| PtobZIP21    | —                                         | —           | <i>P. tomentosa</i> |
| PtobZIP55    | MSPILSEIFISGCMINSTFRRRTHLVQSFSVVFLYWLYYVS | 41          | <i>P. tomentosa</i> |
| PtobZIP33    | —                                         | —           | <i>P. tomentosa</i> |
| PtobZIP6     | —                                         | —           | <i>P. tomentosa</i> |

**Table S5.** Primer sequences used in this study.

| Name                    | Forward (5'- 3')                       | Reverse (5'- 3')                          | Applications           |
|-------------------------|----------------------------------------|-------------------------------------------|------------------------|
| <i>PtobZIP42</i>        | GGAGCAGAAAGCAGGAGGAA                   | CCCGAGTTTGTGTGACAGGG                      | RT-qPCR                |
| <i>PtobZIP25</i>        | GACCAATCCTGGTGTCTAG                    | GCATGGCATTATCTTTATAATT                    |                        |
| <i>PtobZIP32</i>        | TCCAAATCCTCATCCGCAGC                   | CCATGACCAGTGCGAAAAGC                      |                        |
| <i>PtobZIP7</i>         | ACCAATGCTGTAAAGCCGGA                   | CCCGCTTTGTGCCATTGAAA                      |                        |
| <i>PtobZIP49</i>        | ATCAGGTTCTGACGTTGATGCG                 | TGTTCTGTGATTCGAGAGC                       |                        |
| <i>PtobZIP63</i>        | TCAGGCTCTGAAATTGACCCA                  | AACTTTGTTGTCTGATTCGAGAG                   |                        |
| <i>PtobZIP75</i>        | TGTGGAATTGACTGAGAGGC                   | AATAGGCTGTACTGAACACG                      |                        |
| <i>PtobZIP15</i>        | GGTCGTGAACTCTGTGTTGC                   | TTGAAACATATCAGCAGATGCC                    |                        |
| <i>PtobZIP44</i>        | CGAAGCTGAGAACTCTATCC                   | CAAAAGCACCAGTAGTGGG                       |                        |
| <i>PtobZIP27</i>        | GAGATCCTGACAAGGATGA                    | TAGTCGCAGAAACAGAGGC                       |                        |
| <i>PtobZIP21</i>        | GCGTTACTTGAGTGTTGAGG                   | ATTGAAGGTGATCGAGTCTC                      |                        |
| <i>PtobZIP55</i>        | AGGCCGATAACTCAATCTTG                   | CATTAAAGATGCTTGAATCTCC                    |                        |
| <i>PtobZIP33</i>        | CCATCAATGTCAACACACAGC                  | ATCAGGGAGATCCTCGTGATG                     |                        |
| <i>PtobZIP6</i>         | GTCACAACACAGCACTTCTT                   | GCACTAGTTTGGAGATCCTC                      |                        |
| <i>PtoUBQ10</i>         | GTTGATTTTTGCTGGGAAGC                   | GATCTTGGCCTTCACGTTGT                      |                        |
| <i>pGADT7-PtobZIP42</i> | GGAGGCCAGTGAATTCATGGAGGAGCAGAAAGCAGG   | TCTGCAGCTCGAGCTCTTAAGACCAAATGTTTGTATACAGC | Yeast two-hybrid assay |
| <i>pGADT7-PtobZIP25</i> | GGAGGCCAGTGAATTCATGTACACAGACCAATCCT    | TCTGCAGCTCGAGCTCTTACGACTGCTCCCCATTGG      |                        |
| <i>pGADT7-PtobZIP32</i> | GGAGGCCAGTGAATTCATGAACAGTGTGTTCTCAGT   | TCTGCAGCTCGAGCTCTCATTTCTTTTGGCCATCC       |                        |
| <i>pGADT7-PtobZIP7</i>  | GGAGGCCAGTGAATTCATGAATAGTGTCTTCTCAGTGG | TCTGCAGCTCGAGCTCTCATTTCTTTTGGCATCCCTCG    |                        |
| <i>pGBKT7-PtobZIP49</i> | ATGGAGGCCGAATTCATGTCATCATCCCTGGCAAAG   | CCGCTGCAGGTCGACTCTAGAATTTGAACATCCCAGAA GC |                        |

Table S5. continued

| Name                       | Forward (5'- 3')                         | Reverse (5'- 3')                           | Applications                       |
|----------------------------|------------------------------------------|--------------------------------------------|------------------------------------|
| pGBKT7- <i>PtobZIP63</i>   | ATGGAGGCCGAATTCATGCCACCATCCTTTGCAA       | CCGCTGCAGGTCGACTCTAAACTTTGAACATCCCAG       | Yeast two-hybrid assay             |
| pGBKT7- <i>PtobZIP75</i>   | ATGGAGGCCGAATTCATGTCTGCAAGGCAAGCAGCGA    | CCGCTGCAGGTCGACTTCAGCAGATGTCATAATAGGCTGT   |                                    |
| pGBKT7- <i>PtobZIP15</i>   | ATGGAGGCCGAATTCATGTCTGCAAGGCAAGCGG       | CCGCTGCAGGTCGACTCTAATATTGAAACATATCAGCATGAT |                                    |
| pGBKT7- <i>PtobZIP44</i>   | ATGGAGGCCGAATTCATGGCCTCTTCTAGTGGGGCATC   | CCGCTGCAGGTCGACTTAGTACATGATCATGTCCATG      |                                    |
| pGBKT7- <i>PtobZIP27</i>   | ATGGAGGCCGAATTCATGGCCTCTTCTAGTGGGGCATC   | CCGCTGCAGGTCGACTCAGTACATAACCATGTCC         |                                    |
| pGBKT7- <i>PtobZIP21</i>   | ATGGAGGCCGAATTCATGGCTTCCTCTAGTGGAAC      | CCGCTGCAGGTCGACTCAGTAATGAAACATCTCTGC       |                                    |
| pGBKT7- <i>PtobZIP55</i>   | ATGGAGGCCGAATTCATGGCTTCGTCCAGTGGAAC      | CCGCTGCAGGTCGACTCAGTATTGAAACATATCT         |                                    |
| pGBKT7- <i>PtobZIP33</i>   | ATGGAGGCCGAATTCATGGCATCCTCCAGTGGGGATTCC  | CCGCTGCAGGTCGACTCAATACTGAAACAAATCTGGG      |                                    |
| pGBKT7- <i>PtobZIP6</i>    | ATGGAGGCCGAATTCATGGCATCCTCTAGTGGAATT     | CCGCTGCAGGTCGACTTCAATACTGAAACAAATCTGGAGATG | Construction of transgenic vectors |
| amiRNA-1                   | CTGCAAGGCGATTAAGTTGGGTAAC                | GAATTCTCAATCTAGACTTGTTCTCTACATATATATTCT    |                                    |
| amiRNA-2                   | GAGAACAAGTCTAGATTGAGAATTCACAGGTCGTGATATG | GAGAGCAAGTCTAGAATGAGAAATCAAAGAGAATCAATGA   |                                    |
| amiRNA-3                   | GATTTCTCATTCTAGACTTGCTCTCTCTCTTTGTATTCC  | GCGGATAACAATTTACACAGGAA ACAG               |                                    |
| amiRNA-4                   | CTGCAAGGCGATTAAGTTGGGTAAC                | GCGGATAACAATTTACACAGGAA ACAG               | The selection of transgenic lines  |
| <i>bZIP55/21</i> -amiRNA-G | CCCAAAGAGCTCTTCTCTCTC                    | GAGTGGTGATATTGATGCTGG                      |                                    |
